# Supplementary material
Source: PubMed Central journal article supplement (PMC6538940)

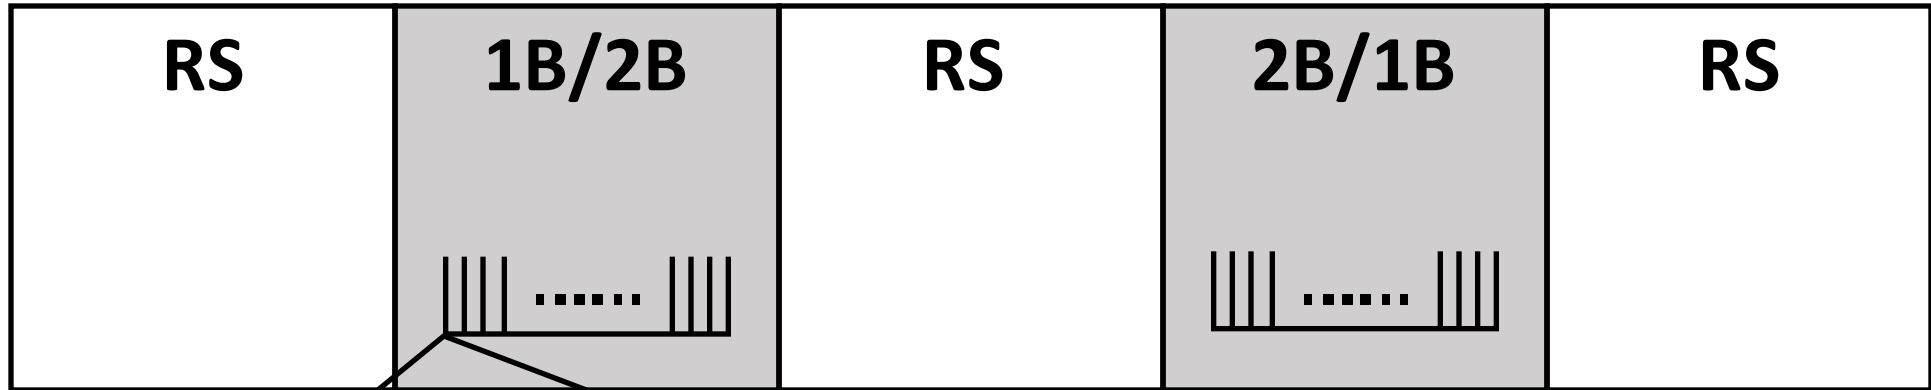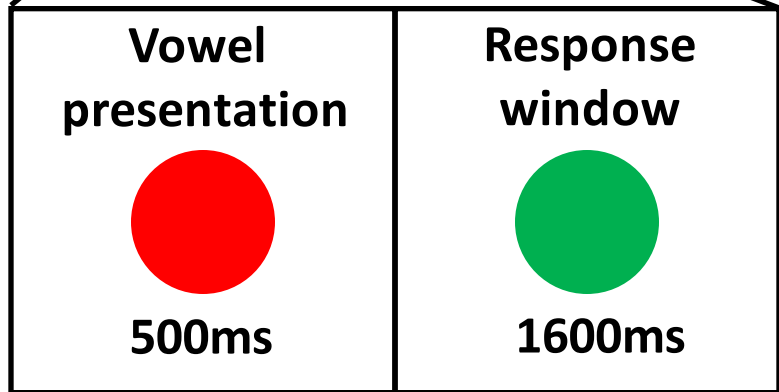

Supplement: NIHMS1528185-supplement-1.pdf [file NIHMS1528185-supplement-1.pdf]
